# Supplementary material for: Ultrasound-visualized, site-specific vascular embolization using magnetic protein microcapsules
Source: Royal Society of Chemistry journal article supplement (doi:10.1039/d0tb02715d), 2021-01-01
Supplement: d0tb02715d1.pdf [file d0tb02715d1.pdf]

**Supporting information for:**

## Ultrasound-visualized, site-specific vascular embolization using magnetic protein microcapsules

Lanxi Chen,<sup>a</sup> Jianhua Zhou,<sup>a</sup> Qiurong Deng,<sup>a</sup> Jialin Feng,<sup>c</sup> Qiong Qiu,<sup>b</sup> Wenwei Huang,<sup>a</sup> Yin Chen <sup>a\*</sup> and Yan Li<sup>a\*</sup>

<sup>a</sup> School of Biomedical Engineering, Sun Yat-sen University, Guangzhou 510006, China

<sup>b</sup> Department of Cardiology, Sun Yat-sen Memorial Hospital of Sun Yat-sen University, 107 Yanjiang West Road, Guangzhou 510120, China

<sup>c</sup> Department of Chemistry, University of Cambridge, Lensfield Road, Cambridge, United Kingdom

Correspondence: chenxin8@mail.sysu.edu.cn (Y. Chen); liyan99@mail.sysu.edu.cn (Y. Li); Tel./Fax: +86-20-3938-7890

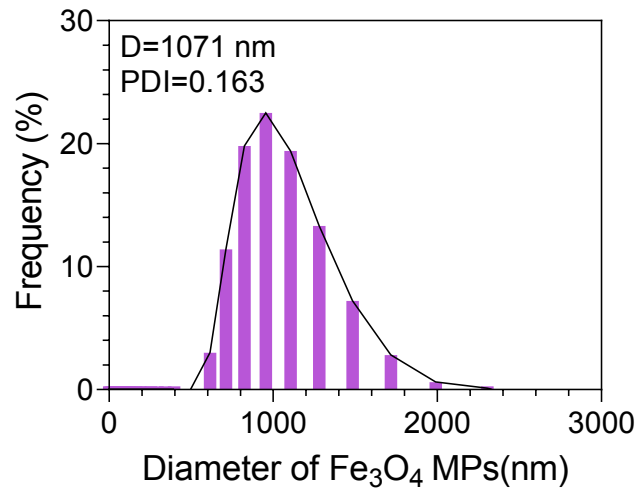

**Fig. S1.** Size distribution of the ferromagnetic Fe<sub>3</sub>O<sub>4</sub> microparticles.

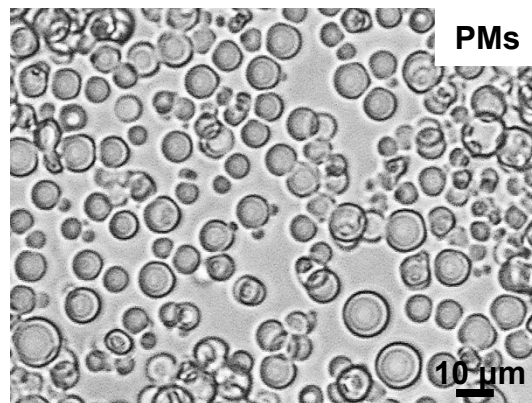

**Fig. S2.** Optical image of the blank protein microcapsules (PMs).

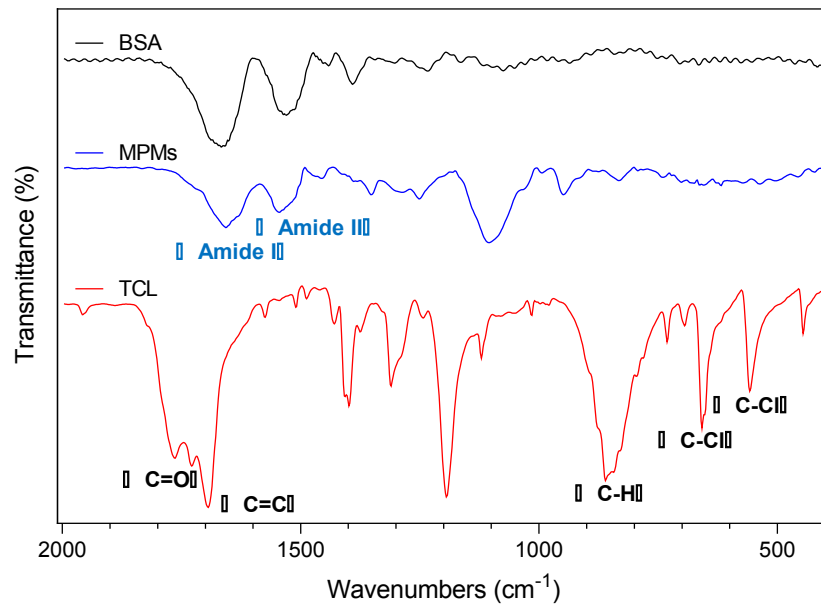

**Fig. S3.** FTIR spectra of BSA, TCL and the MPMs. The characteristic peaks of acyl chloride bond, amide I band and amide II band are  $658\text{ cm}^{-1}$ ,  $1660\text{ cm}^{-1}$  and  $1549\text{ cm}^{-1}$ , respectively.

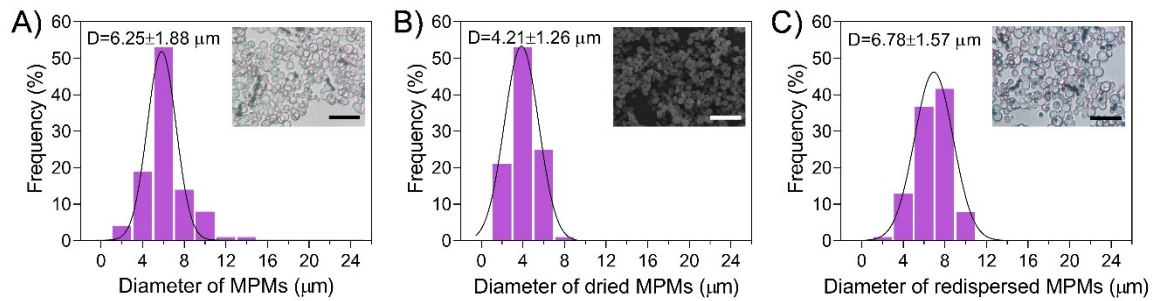

**Fig. S4.** Size distribution of the MPMs after (A) preparation, (B) lyophilization and (C) redispersion. (insets: images of the MPMs at different states, scale bar:  $30\text{ }\mu\text{m}$ )

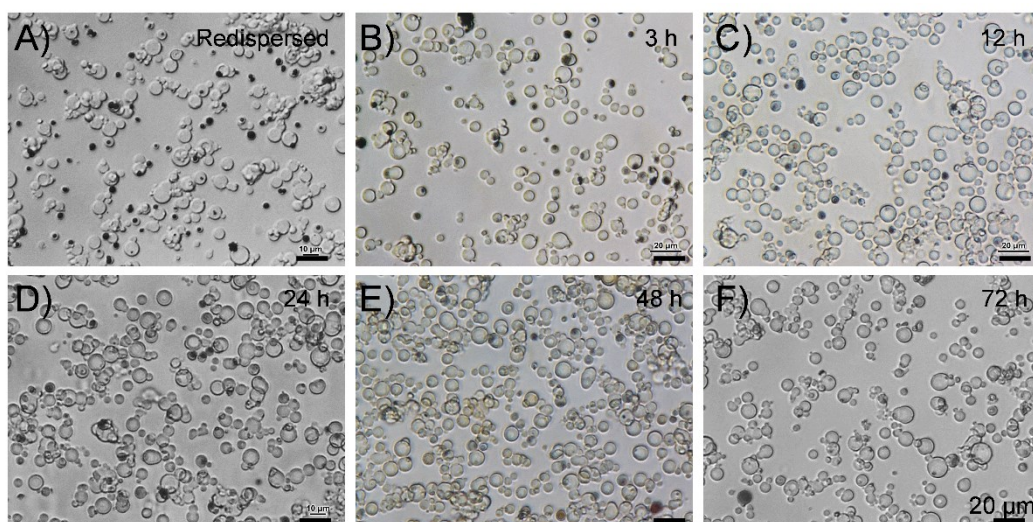

**Fig. S5.** Optical images of MPMs at 3, 12, 24, 48 and 72 h after immersion in saline at 37°C.

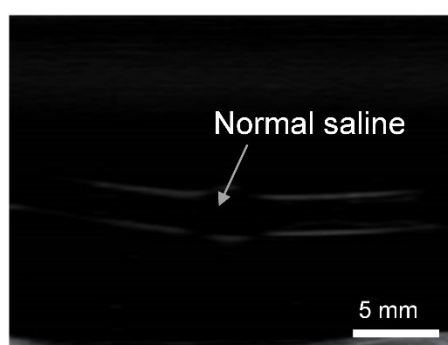

**Fig. S6.** Ultrasound image of normal saline in the hydrogel channel.

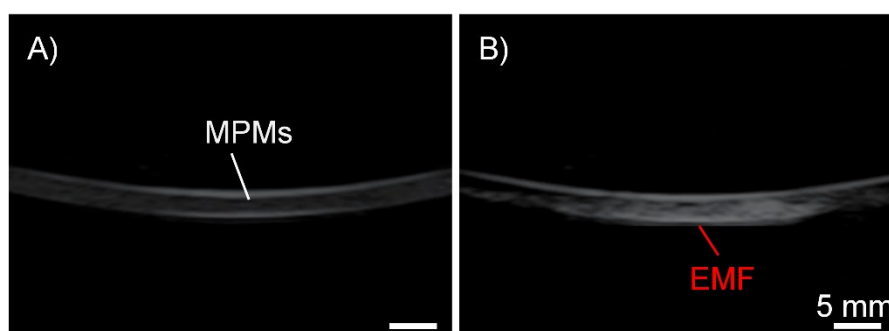

**Fig. S7.** Ultrasound images of the MPMs in the target channel before (A) and after (B) the application of an external magnetic field

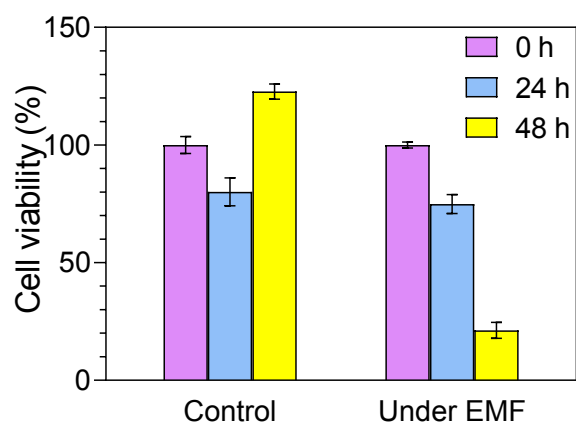

**Fig. S8.** Viabilities of HepG2 cells at different culture conditions (data= mean  $\pm$  SD; n=6).

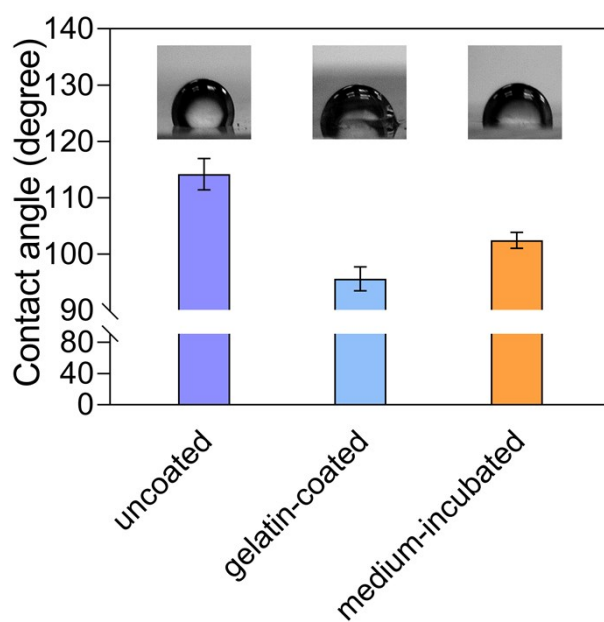

**Fig. S9.** Water contact angle measurement of PDMS substrate surfaces in different states (medium-incubated: PDMS substrates after coated with gelatin and then further incubated in medium for 24 h at 37°C). (data=mean  $\pm$  SD; n=6)

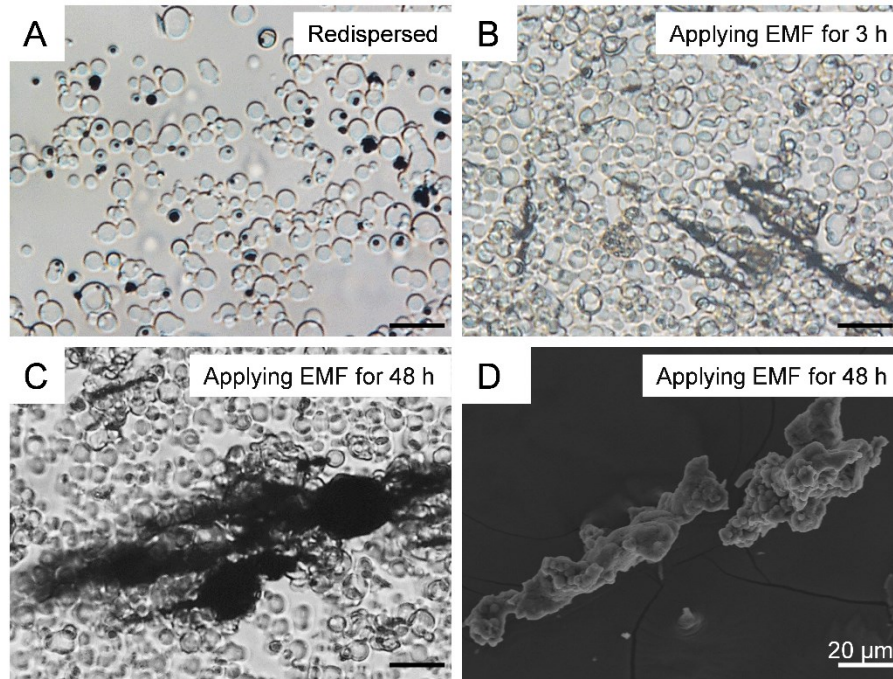

**Fig. S10.** Optical images of MPMs (A) when redispersed in saline, at (B) 3 h and (C) 48 h after applying an EMF. (D) SEM images of MPMs after applying an EMF for 48 h.
